# Supplementary material
Source: PubMed Central journal article supplement (PMC6436009)

**Subclonal STAT3 Mutations Solidify Clonal Dominance.**

Cassandra M. Kerr, Michael J. Clemente, Peter W. Chomczynski, Bartłomiej Przychodzen, Yasunobu Nagata, Vera Adema, Valeria Visconte, Alan E. Lichtin, Satu Mustjoki, Tomas Radivoyevitch, Mikkael A. Sekeres, Jaroslaw P. Maciejewski

**Correspondence:** Jaroslaw Maciejewski, Taussig Cancer Center, Cleveland Clinic, 9500 Euclid Avenue, Cleveland OH USA 44195, Phone: 216-445-5962, E-mail: [maciejj@ccf.org](mailto:maciejj@ccf.org)

### **Supplemental Table 1. LGL Diagnostic Criteria**

LGL diagnosis established by the presence of  $\geq 3/5$  of the following criteria:

- LGL count  $>500/\mu\text{L}$
- TCR rearrangement detected by PCR
- Presence of abnormal immunophenotype
- VB expansion by flow cytometry
- BM infiltration by LGL

**Supplemental Table 2. T-LGL leukemia cohort characteristics (N=207)**

| Parameter                        | Value       |
|----------------------------------|-------------|
| Median AAD                       | 61          |
| Gender                           | 110M :97F   |
| Median FU                        | 40 Months   |
| T-LGL                            | 92%         |
| NK-LGL                           | 8%          |
| TCR Rearrangement by PCR         | 95%         |
| VB Skewing                       |             |
| TCR Deep Sequencing              | 23%         |
| Longitudinal                     | 10%         |
| STAT3 Deep Sequencing            | 100%        |
| Longitudinal                     | 44%         |
| <b>STAT3 Mutation</b>            | <b>38%</b>  |
| Y640F                            | 42%*        |
| D661Y                            | 34%*        |
| D661V                            | 11%*        |
| N647I                            | 8%*         |
| <b>Hematologic Manifestation</b> |             |
| Asymptomatic                     | 8%          |
| Anemia                           | 53%         |
| Neutropenia                      | 46%         |
| Thrombocytopenia                 | 24%         |
| Multilineage Cytopenia           | 26%         |
| Pancytopenia                     | 9%          |
| <b>Response to IST</b>           |             |
| CSA                              | 29/75 (39%) |
| CYC                              | 24/52 (46%) |
| MTX                              | 26/69 (37%) |

AAD- age at diagnosis, FU-Follow-up, CSA-cyclosporine, CYC- cyclophosphamide, MTX- methotrexate

\*% of mutant cases

**Supplemental Figure 1. Clonal dynamics of TCR clonotypes throughout clinical course of NK-LGL patients.** Fish plots depicting the clonal expansions of 2 NK-LGL patients. Sampling time points are shown along the X-axis and the clonal burden is shown on the Y-axis.

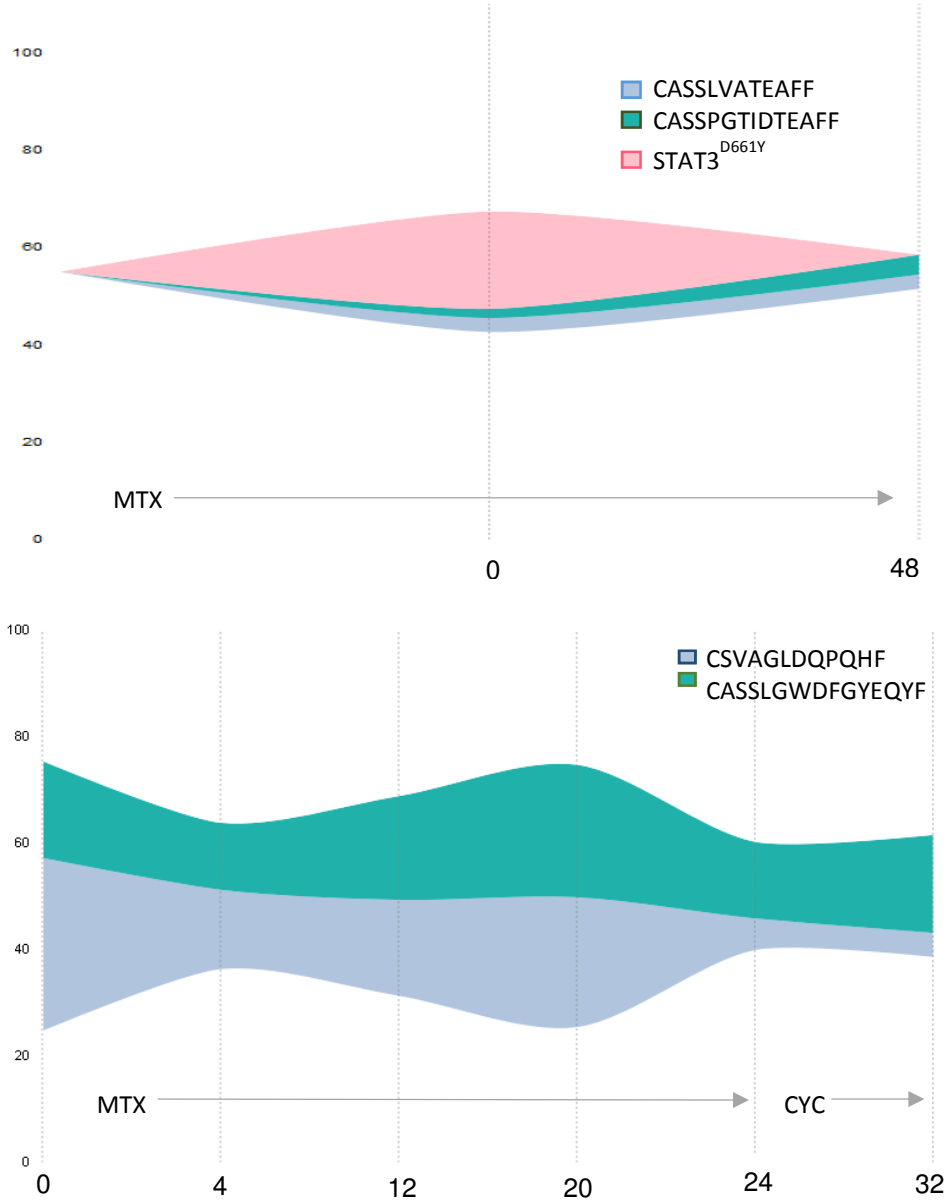

**Supplemental Figure 2. Depiction of the oligoclonal skewing of TCR clonotypes during disease manifestation of T LGL.** The clonal expansion can be visualized as each sphere represents a clone and each color represents a clone with a specific CDR3 “biological barcode”. Following treatment, three scenarios can be seen: in responders (a) contraction or (b) silencing, and in non-responders (a) clonal persistence or (b) the expansion of a previously minor clonotype. MT signifies a STAT3 mutation. Tx-treatment.

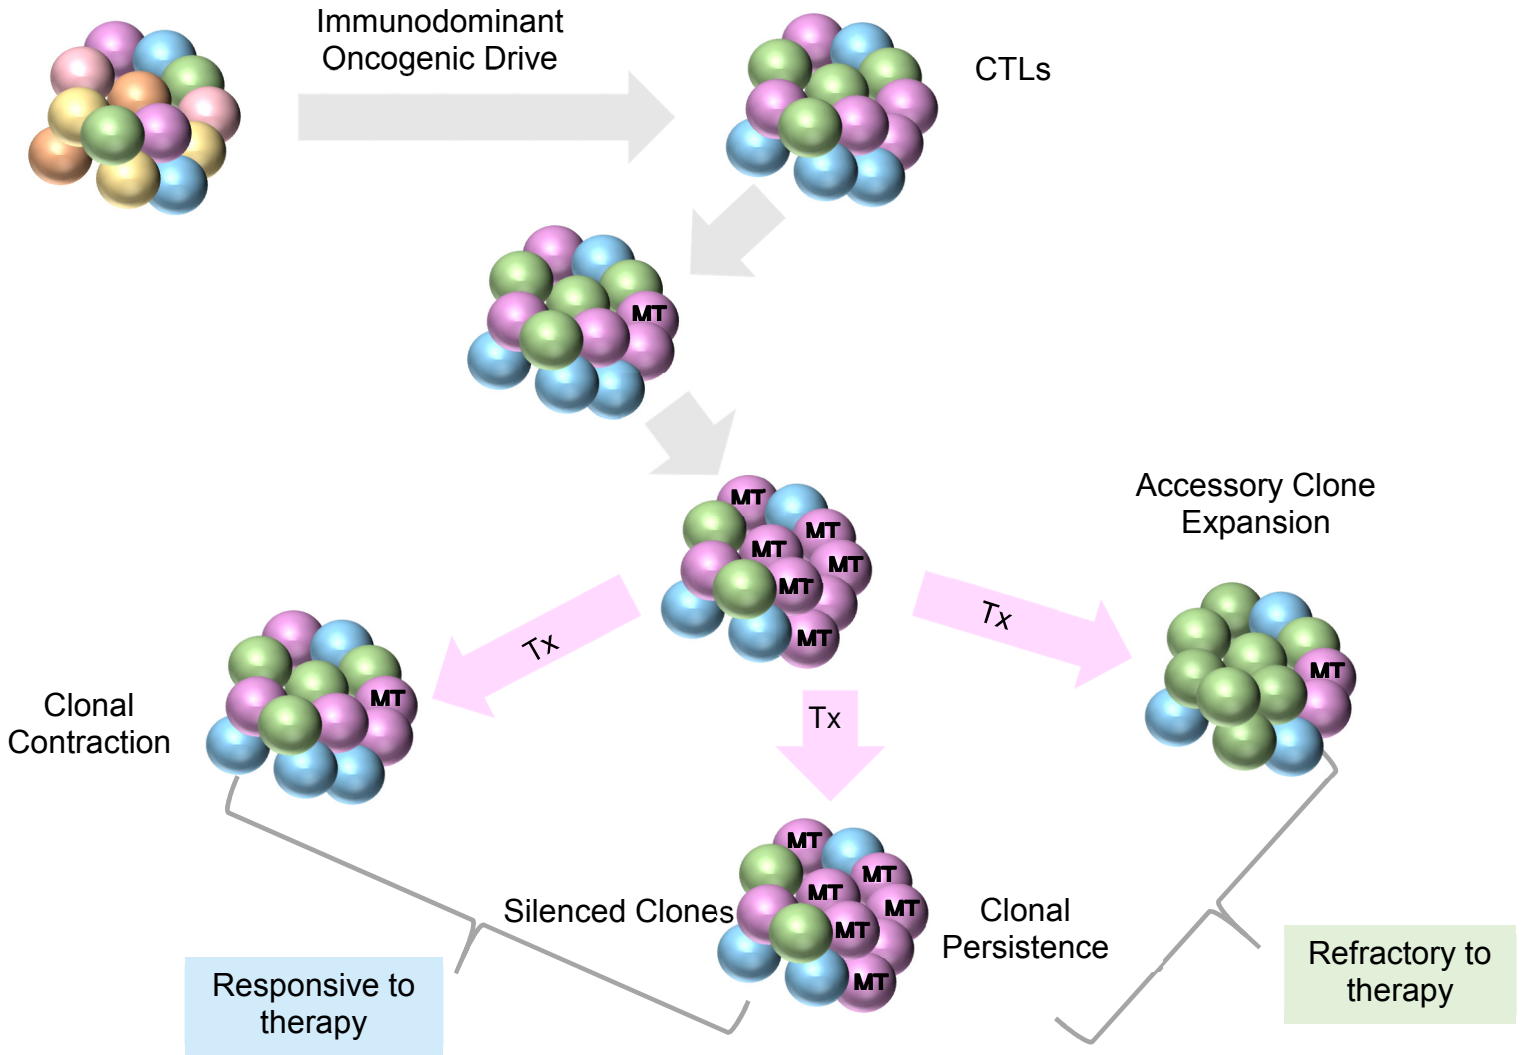

Supplement: ba027862-suppl1.pdf [file ba027862-suppl1.pdf]
